# Supplementary material
Source: PubMed Central journal article supplement (PMC4119593)

a

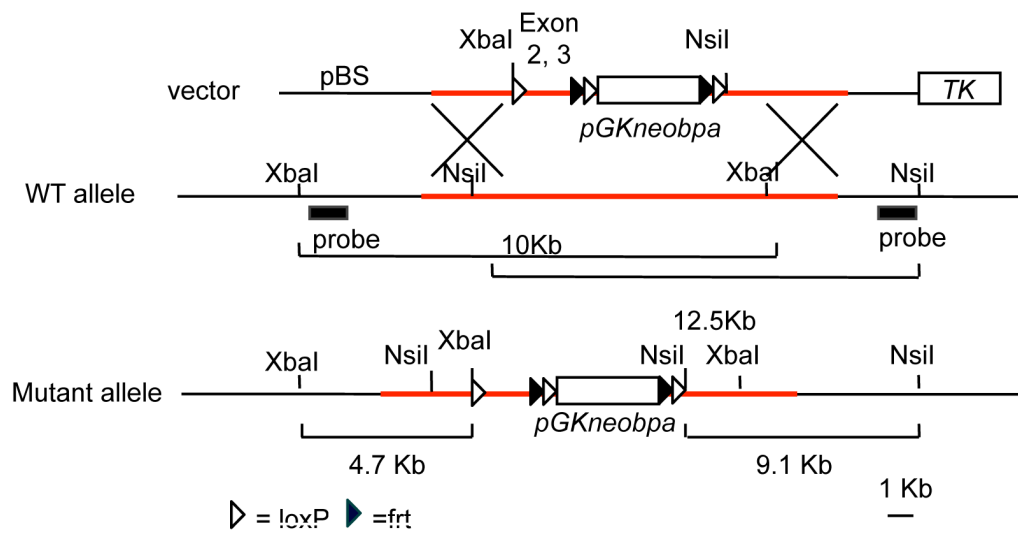

b

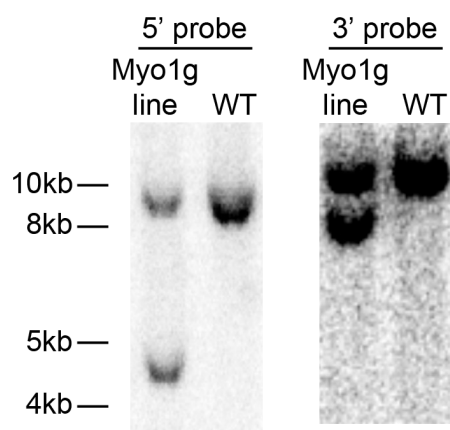

c

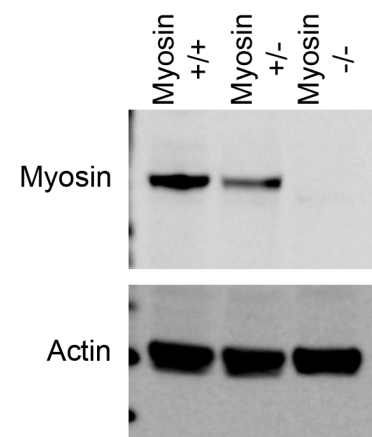

d

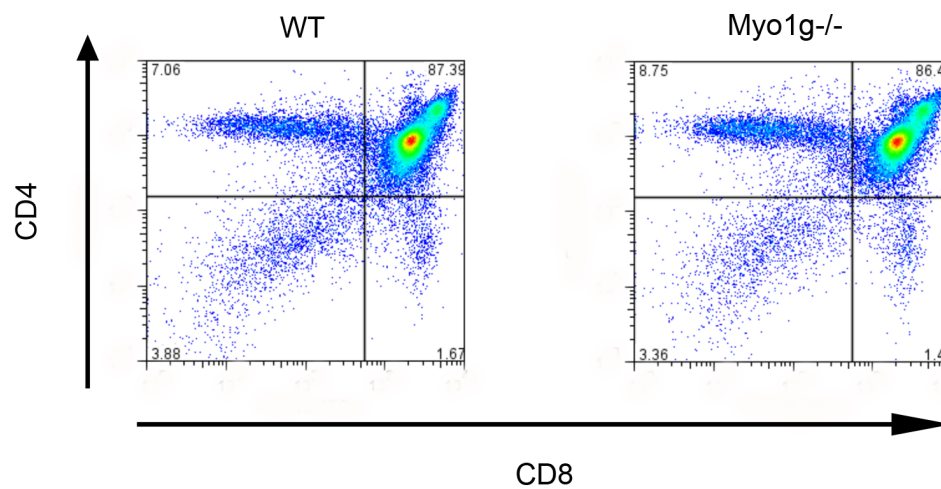

e

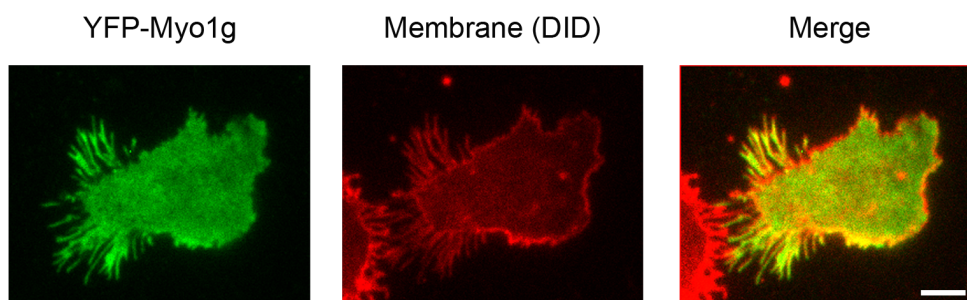

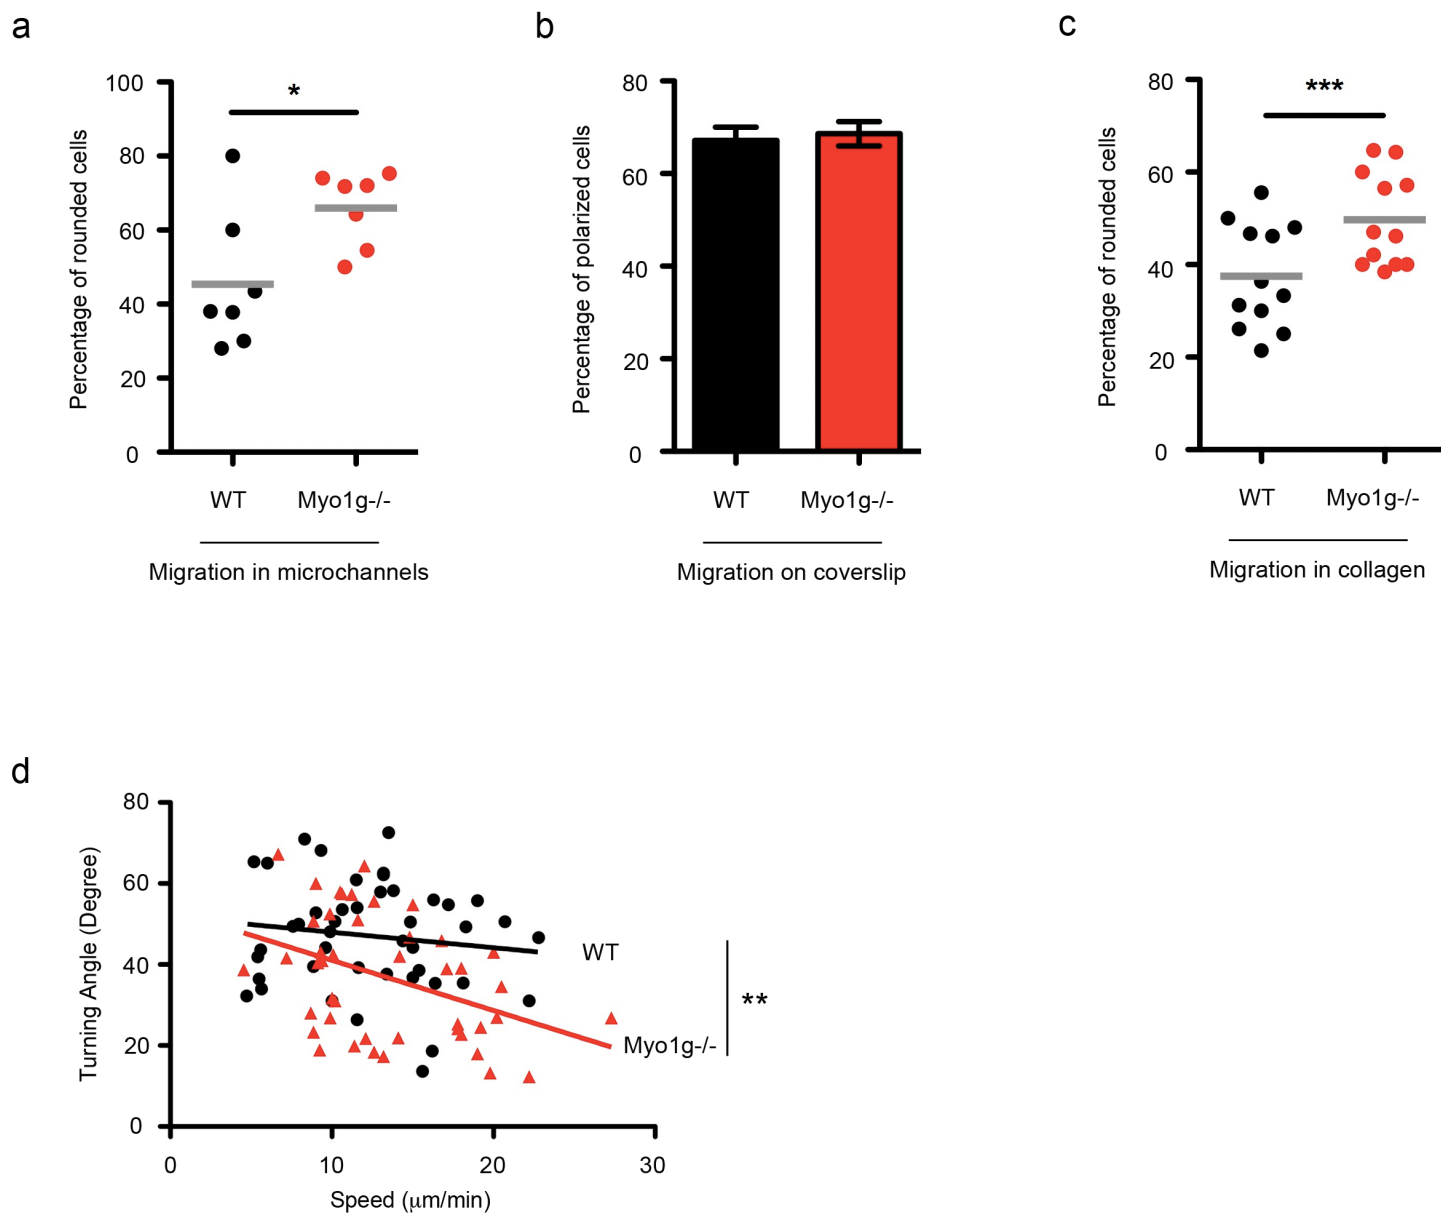

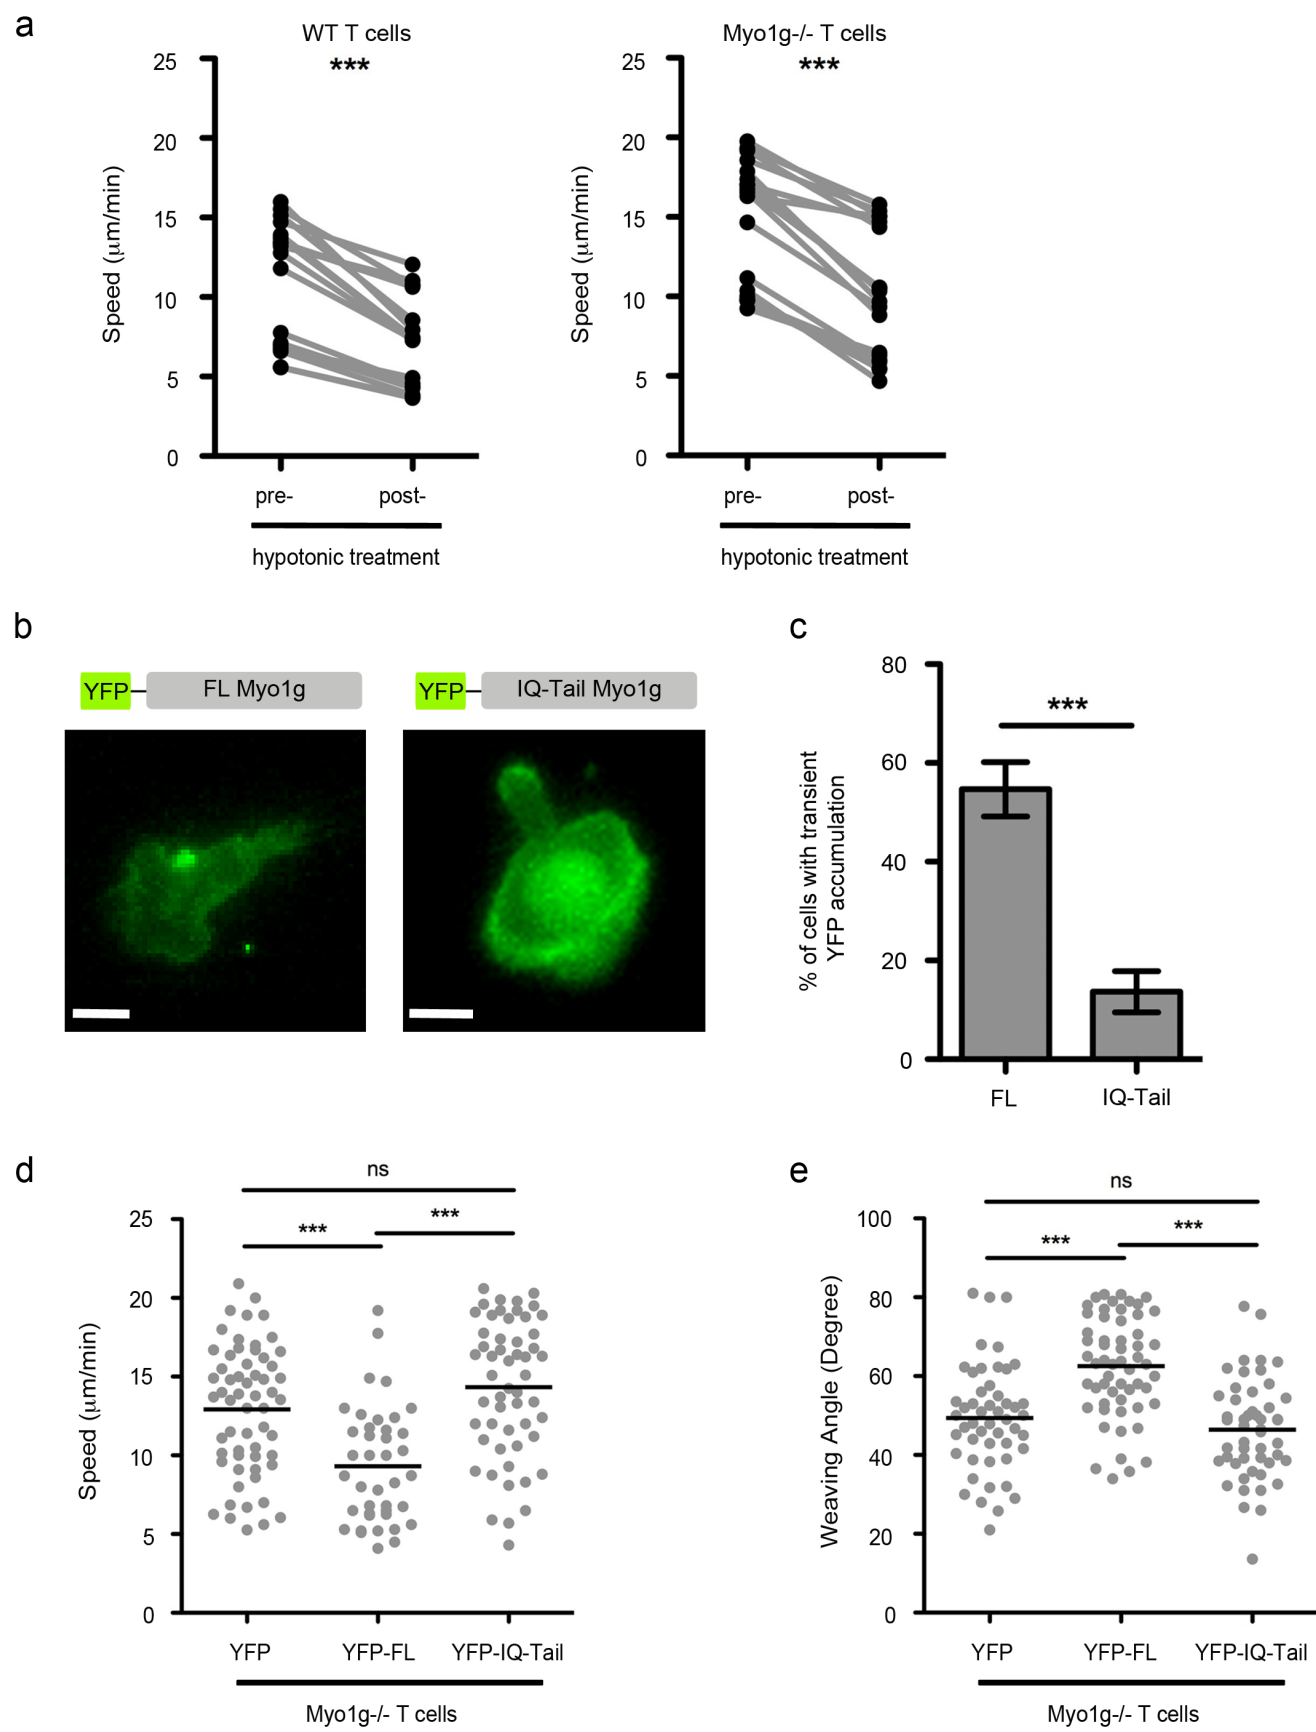

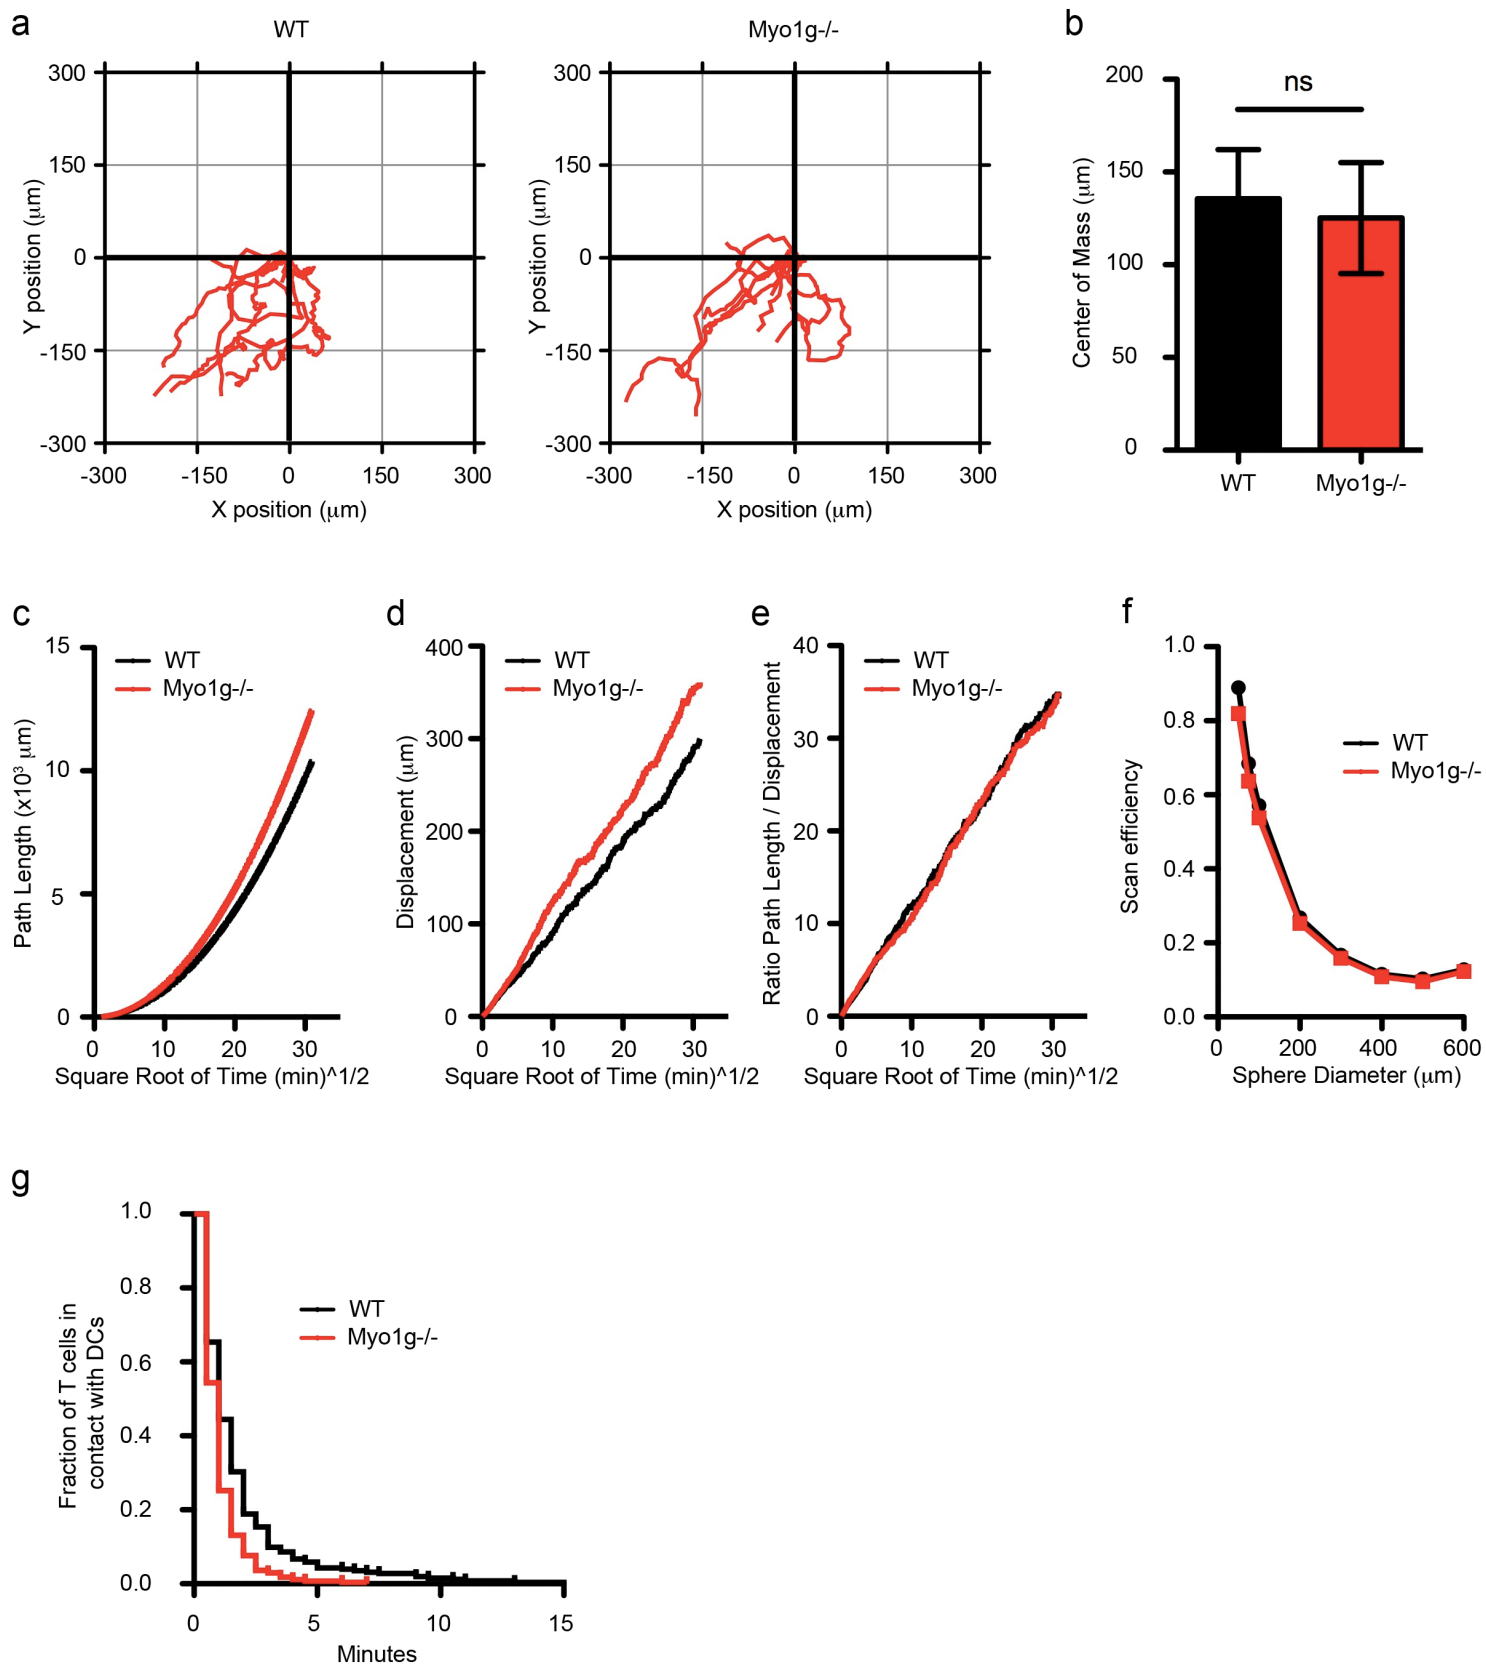

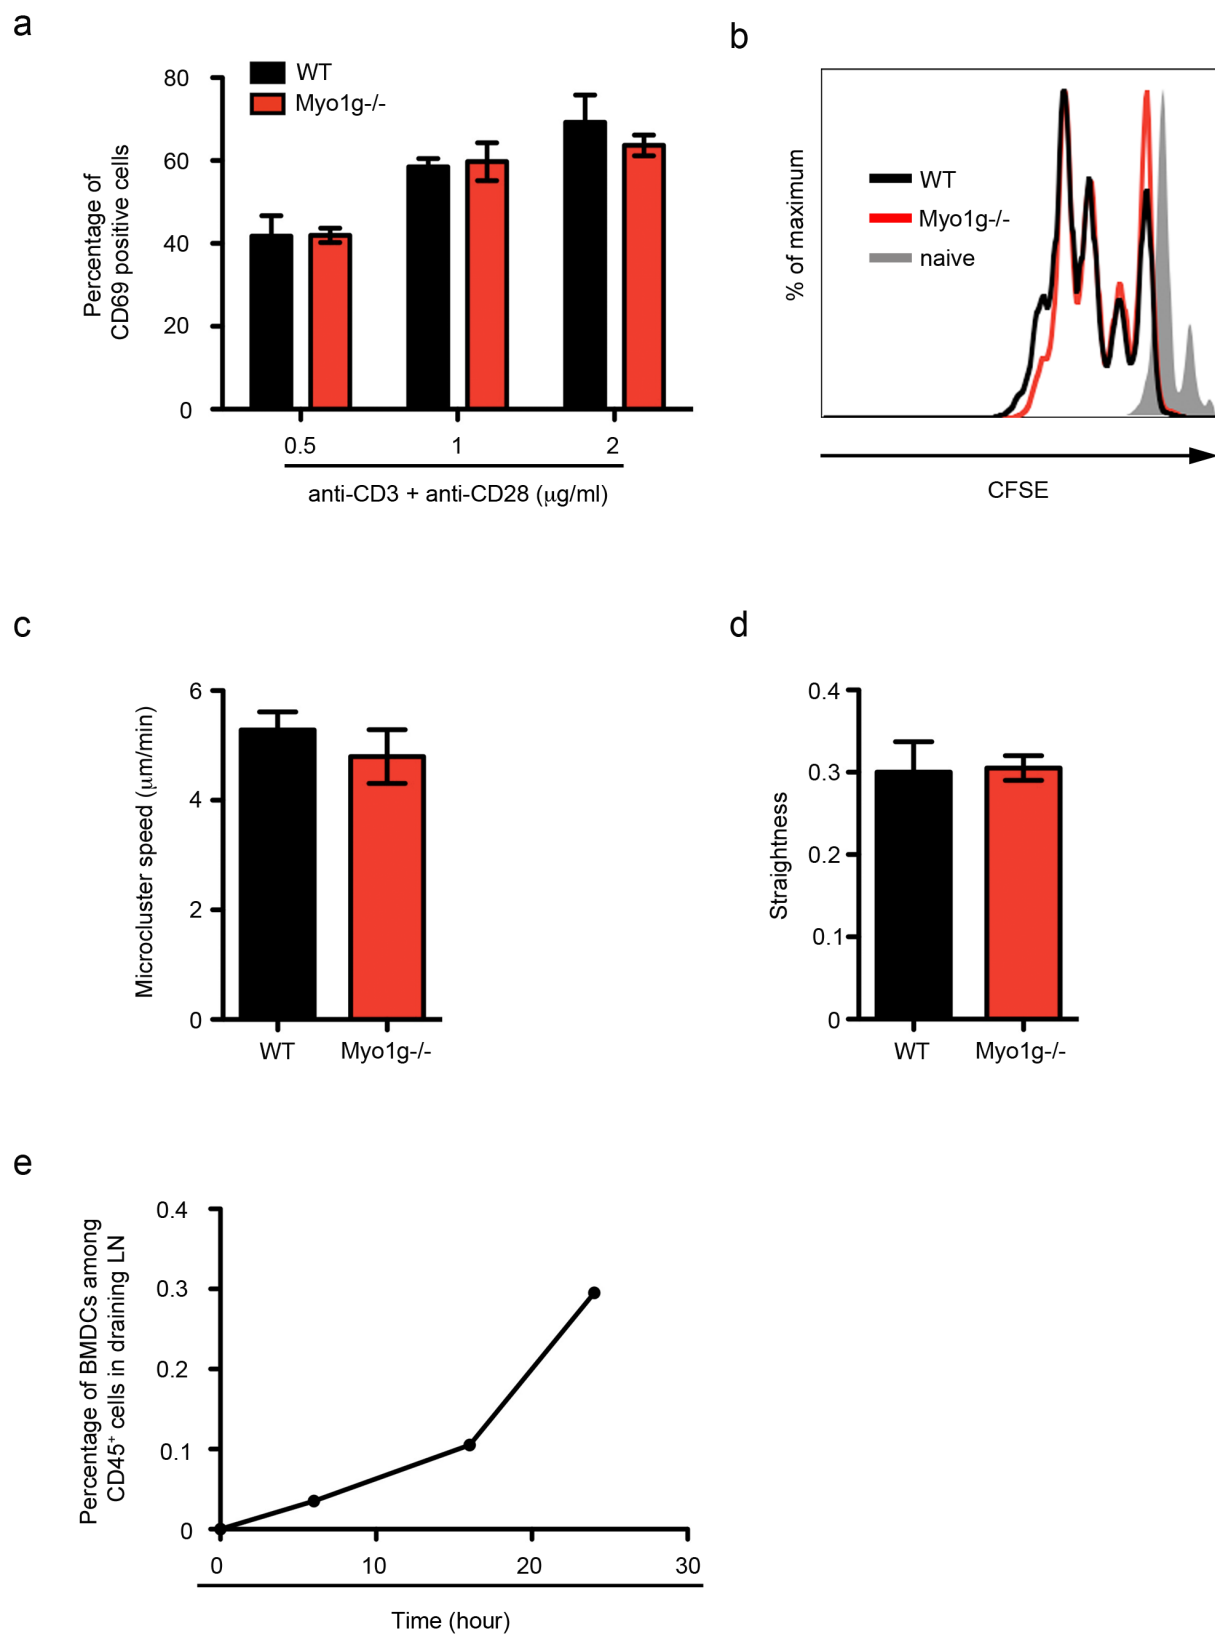

Supplement: NIHMS607175-supplement-02.pdf [file NIHMS607175-supplement-02.pdf]
